# Supplementary material for: Wuschel2 enables highly efficient CRISPR/Cas-targeted genome editing during rapid de novo shoot regeneration in sorghum
Source: PubMed Central journal article supplement (PMC9001672; doi:10.1038/s42003-022-03308-w), 2022-04-11
Supplement: 42003_2022_3308_MOESM2_ESM.pdf [file 42003_2022_3308_MOESM2_ESM.pdf]

## Supplementary information

### a pPHP79066

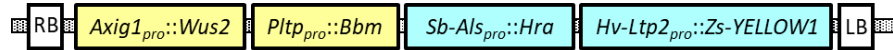

### b pPHP8181

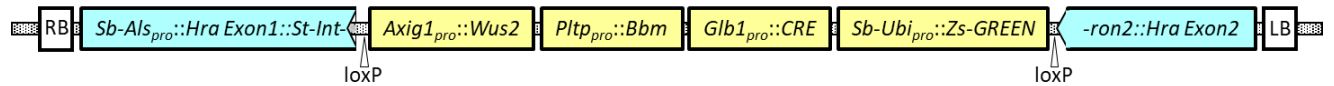

### c pPHP94632

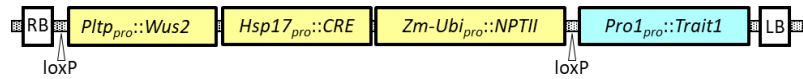

### d pPHP94292

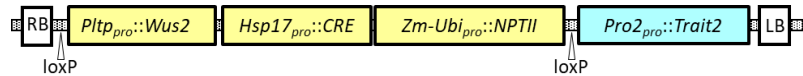

### e PHP87078 ("Altruistic")

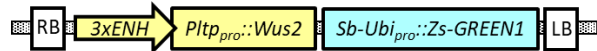

### f pPHP88158 ("Altruistic")

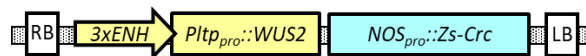

### g pPHP96564

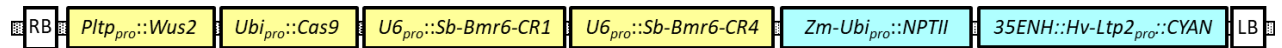

### h pPHP86655

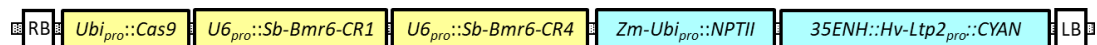

### i pPHP87980

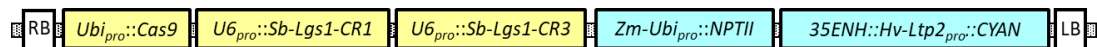

j pPHP86801

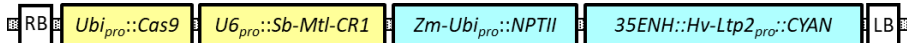

k pPHP87098

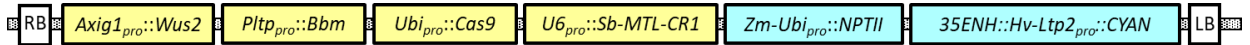

l pPHP87018

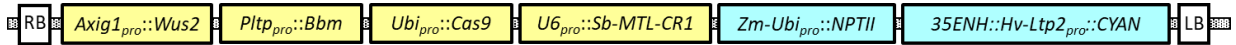

m pPHP87984

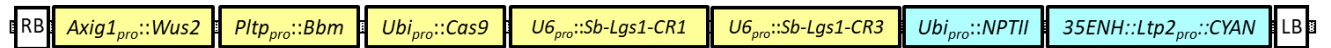

**Supplementary Figure 1 Schematic representation of the molecular components of constructs used in this study.**

## Transformation procedures

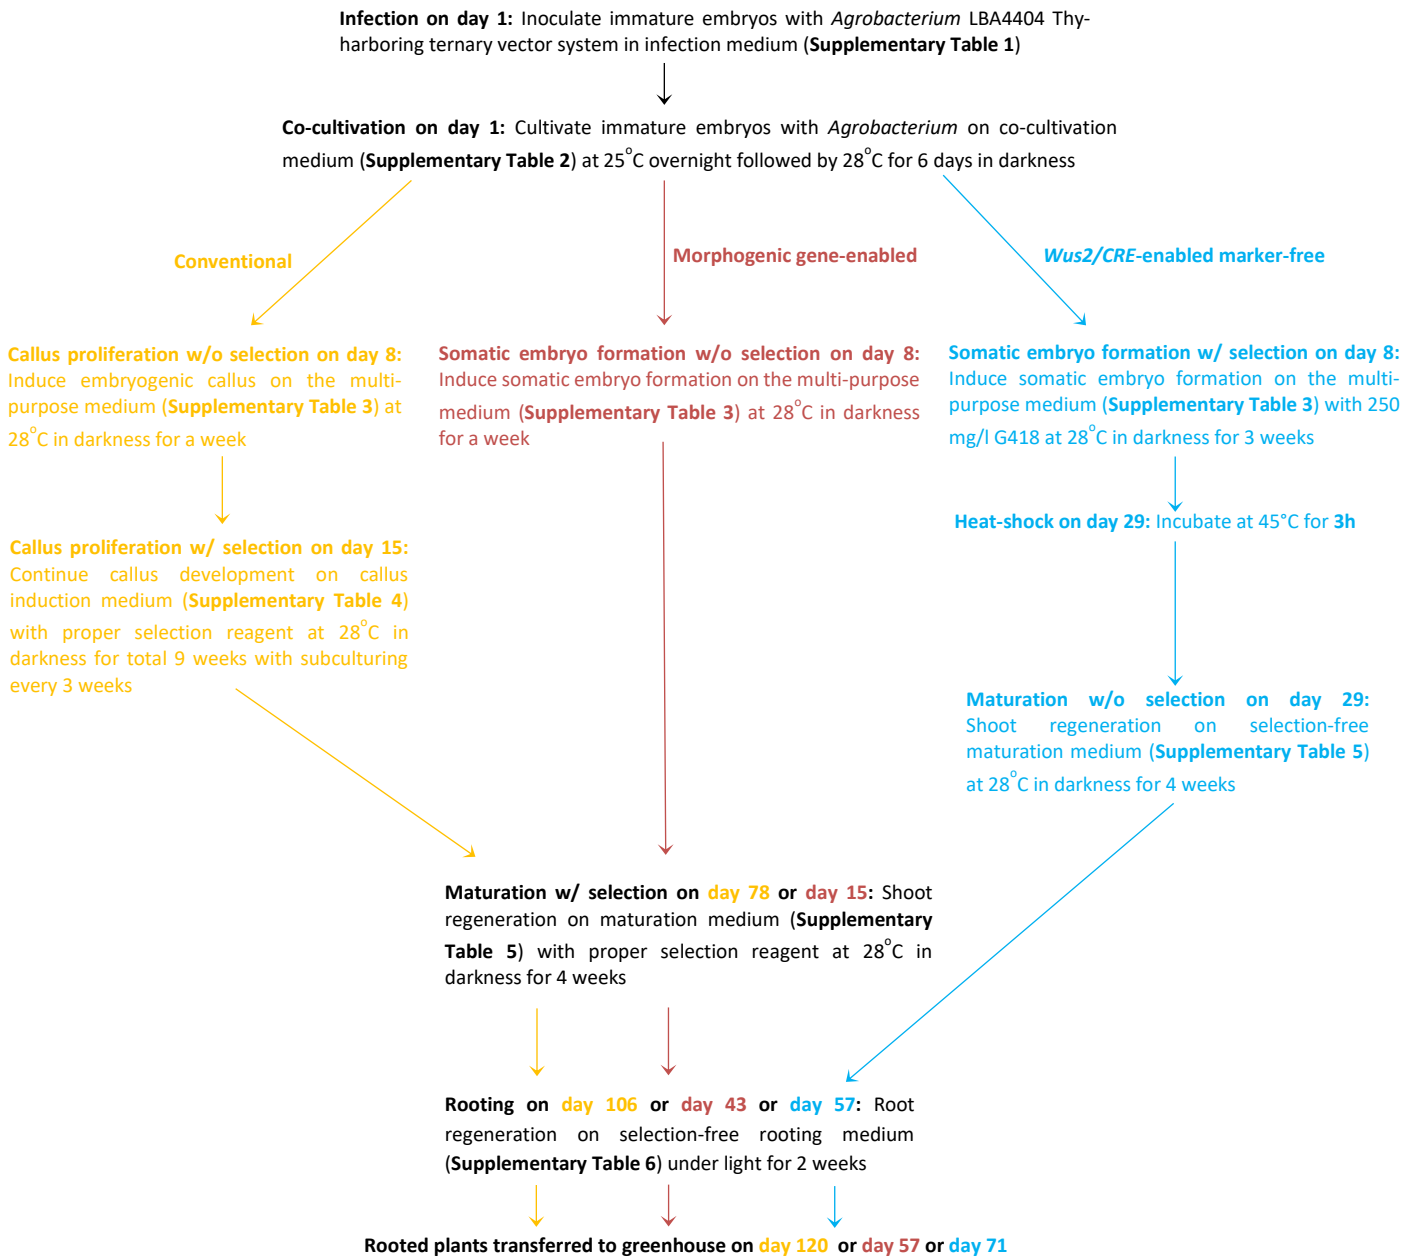

**Supplementary Figure 2 Flow diagram of the *Agrobacterium*-mediated transformation systems.**

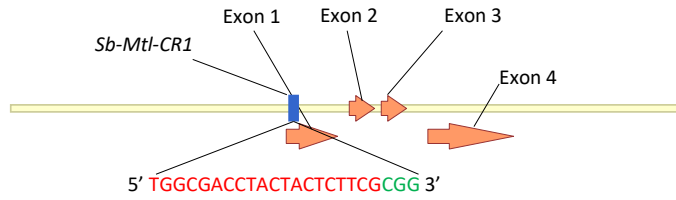

**Supplementary Figure 3 Diagram of the *Sb-Mtl* gene structure and target site.** Gene structure of *Sb-Mtl* with sgRNA target site (in red) and PAM sequence (in green).

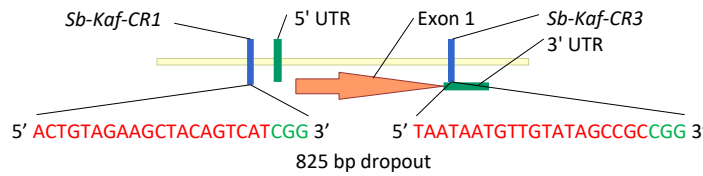

**Supplementary Figure 4 | Diagram of the *Sb-Kaf* gene structure and target sites.** Gene structure of *Sb-Kaf* with sgRNA target sites (in red) and PAM sequences (in green).

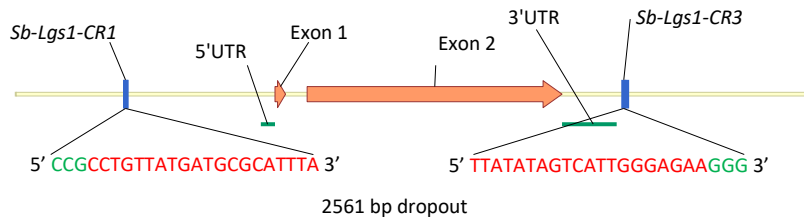

**Supplementary Figure 5 Diagram of the *Sb-Lgs1* gene structure and target sites.** Gene structure of *Sb-Lgs1* with sgRNA target sites (in red) and PAM sequences (in green).

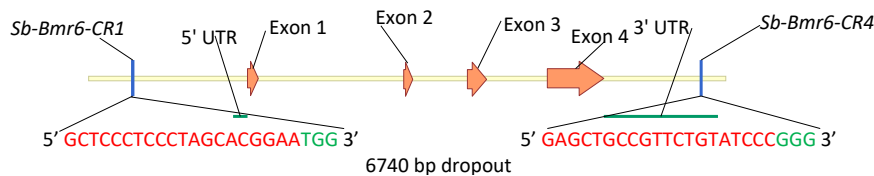

**Supplementary Figure 6 Diagram of the *Sb-Bmr6* gene structure and target sites.** Gene structure of *Sb-Bmr6* with sgRNA target sites (in red) and PAM sequences (in green).

### Supplementary Table 1 Infection medium

|                                      |                    |
|--------------------------------------|--------------------|
| MS salt                              | 4.3 g/l            |
| Myo-Inositol                         | 0.1 g/l            |
| Nicotinic acid                       | 0.5 mg/l           |
| Pyridoxine HCl                       | 0.5 mg/l           |
| Thiamine HCl                         | 1 mg/l             |
| Casamino acids                       | 1 g/l              |
| Dichlorophenoxyacetic acid (2,4-D)   | 1.5 mg/l           |
| Sucrose                              | 68.5 g/l           |
| Glucose                              | 36 g/l             |
| Thymidine                            | 50 mg/l            |
| Acetosyringone                       | 100 µM (Add fresh) |
| Silwet L-77                          | 0.005%             |
| Adjusted OD for <i>Agrobacterium</i> | 1.0                |

### Supplementary Table 2 Co-cultivation medium

|                                    |                    |
|------------------------------------|--------------------|
| MS salt                            | 4.3 g/l            |
| Myo-Inositol                       | 0.1 g/l            |
| Nicotinic acid                     | 0.5 mg/l           |
| Pyridoxine HCl                     | 0.5 mg/l           |
| Thiamine HCl                       | 1 mg/l             |
| Dichlorophenoxyacetic acid (2,4-D) | 2 mg/l             |
| Sucrose                            | 20 g/l             |
| Glucose                            | 10 g/l             |
| L-Proline                          | 0.7 g/l            |
| MES Buffer                         | 0.5 g/l            |
| Sigma Agar                         | 8 g/l              |
| Acetosyringone                     | 100 µM (Add fresh) |
| Ascorbic acid                      | 10 mg/l            |
| Thymidine                          | 50 mg/l            |

### Supplementary Table 3 Multi-purpose medium

|                                    |           |
|------------------------------------|-----------|
| MS salt                            | 4.3 g/l   |
| Myo-Inositol                       | 0.25 g/l  |
| Casein hydrolysate                 | 1 g/l     |
| Thiamine HCl                       | 1 mg/l    |
| Dichlorophenoxyacetic acid (2,4-D) | 2 mg/l    |
| Maltose                            | 30 g/l    |
| L-Proline                          | 0.69 g/l  |
| Cupric sulfate                     | 1.22 mg/l |
| Phytigel                           | 3.5 g/l   |
| BAP                                | 0.5 mg/l  |
| Carbenicillin                      | 100 mg/l  |
| Selection reagent*                 |           |

\*Either no selection or 250mg/l G418 or 0.1mg/l imazapyr.

### Supplementary Table 4 Callus proliferation medium

|                                    |           |
|------------------------------------|-----------|
| MS salt                            | 4.3 g/l   |
| Myo-Inositol                       | 0.25 g/l  |
| Casein hydrolysate                 | 1 g/l     |
| Thiamine HCl                       | 1 mg/l    |
| Dichlorophenoxyacetic acid (2,4-D) | 1 mg/l    |
| Maltose                            | 30 g/l    |
| L-Proline                          | 0.69 g/l  |
| Cupric sulfate                     | 1.22 mg/l |
| Phytigel                           | 3.5 g/l   |
| BAP                                | 0.5 mg/l  |
| Carbenicillin                      | 100 mg/l  |
| Selection reagent*                 |           |

\* Either no selection or 250mg/l G418 or 0.1mg/l imazapyr.

### Supplementary Table 5 Maturation medium

|                                                                                                            |           |
|------------------------------------------------------------------------------------------------------------|-----------|
| MS salt                                                                                                    | 4.3 g/l   |
| Myo-Inositol                                                                                               | 0.1g/l    |
| MS vitamins stock (0.1 g/l nicotinic acid, 0.1 g/l pyridoxine HCl, 0.02 g/l thiamine HCl, 0.4 g/l glycine) | 5 ml/l    |
| zeatin                                                                                                     | 0.5 mg/l  |
| Cupric sulfate                                                                                             | 1.25 mg/l |
| L-Proline                                                                                                  | 0.7 g/l   |
| Sucrose                                                                                                    | 60 g/l    |
| Phytigel                                                                                                   | 3.5 g/l   |
| Indole-3-acetic acid                                                                                       | 1 mg/l    |
| ABA                                                                                                        | 0.1 µM    |
| Thidiazuron                                                                                                | 0.1 mg/l  |
| Carbenicillin                                                                                              | 100 mg/l  |
| Selection reagent*                                                                                         |           |

\* Either no selection or 250mg/l G418 or 0.1mg/l imazapyr.

### Supplementary Table 6 Rooting medium

|                                                                                                            |          |
|------------------------------------------------------------------------------------------------------------|----------|
| MS salt                                                                                                    | 2.15 g/l |
| Myo-Inositol                                                                                               | 0.05 g/l |
| MS vitamins stock (0.1 g/l nicotinic acid, 0.1 g/l pyridoxine HCl, 0.02 g/l thiamine HCl, 0.4 g/l glycine) | 2.5 ml   |
| Sucrose                                                                                                    | 20 g/l   |
| Phytigel                                                                                                   | 3 g/l    |

**Supplementary Table 7 The integrated morphogenic gene-enabled transformation efficiencies of six Corteva elite lines**

| Genotype | # of embryos infected | # of T0 plants | Transformation efficiency (%) |
|----------|-----------------------|----------------|-------------------------------|
| PH1679   | 280                   | 4              | 1.4                           |
| PH1719   | 233                   | 47             | 20.1                          |
| PH1181   | 240                   | 16             | 6.7                           |
| PH2517   | 162                   | 29             | 17.9                          |
| PH1481   | 235                   | 54             | 23                            |
| PH2545   | 226                   | 56             | 24.7                          |

**Supplementary Table 8 *Sb-Mtl* mutation frequency using single gRNA in Tx430**

| Transformation system               | Construct                                                            | sgRNA             | # T0 plants analyzed | # of T0 events w/ mutation (freq.) |
|-------------------------------------|----------------------------------------------------------------------|-------------------|----------------------|------------------------------------|
| Conventional                        | pPHP86801                                                            | <i>Sb-Mtl-CR1</i> | 29                   | 8 (27.5%)                          |
| Integrated morphogenic gene-enabled | pPHP87098 ( <i>Axig1<sub>pro</sub>:Wus2/Pltp<sub>pro</sub>:Bbm</i> ) | <i>Sb-Mtl-CR1</i> | 97                   | 72 (74.2%)                         |

**Supplementary Table 9 *Sb-Kaf* mutation and gene-dropout frequencies using two gRNAs in Tx430**

| Transformation system                          | Construct                                                                                     | sgRNA             | # T0 plants analyzed | # of T0 events w/ mutation (freq.) | # T0 events w/ gene-dropout (freq.) |
|------------------------------------------------|-----------------------------------------------------------------------------------------------|-------------------|----------------------|------------------------------------|-------------------------------------|
| Conventional                                   | pPHP87018                                                                                     | <i>Sb-Kaf-CR1</i> | 33                   | 13 (39.3%)                         | 0                                   |
|                                                |                                                                                               | <i>Sb-Kaf-CR3</i> |                      | 16 (48.5%)                         |                                     |
| Non-integrated <i>Wus2</i> -enabled altruistic | (90%) pPHP87018+(10%) PHP88158 ( <i>3xENH:Pltp<sub>pro</sub>:Wus2/NOS<sub>pro</sub>:Crc</i> ) | <i>Sb-Kaf-CR1</i> | 33                   | 21 (63.6%)                         | 1 (3.0%)                            |
|                                                |                                                                                               | <i>Sb-Kaf-CR3</i> |                      | 22 (66.7%)                         |                                     |

**Supplementary Table 10 *Sb-Lgs1* mutation and gene-dropout frequencies using two gRNAs in Macia**

| Transformation system                          | Construct                                                                                    | sgRNA              | # T0 plants analyzed | # of T0 events w/ mutation (freq.) | # T0 events w/ gene-dropout (freq.) |
|------------------------------------------------|----------------------------------------------------------------------------------------------|--------------------|----------------------|------------------------------------|-------------------------------------|
| Integrated morphogenic gene-enabled            | PHP87984 ( <i>Axig1<sub>pro</sub>:Wus2/Pltp<sub>pro</sub>:Bbm</i> )                          | <i>Sb-Lgs1-CR1</i> | 42                   | 35 (83.3%)                         | 22 (52.4%)                          |
|                                                |                                                                                              | <i>Sb-Lgs1-CR3</i> |                      | 39 (92.9%)                         |                                     |
| Non-integrated <i>Wus2</i> -enabled altruistic | (90%) PHP87980+(10%) PHP88158 ( <i>3xENH:Pltp<sub>pro</sub>:Wus2/NOS<sub>pro</sub>:Crc</i> ) | <i>Sb-Lgs1-CR1</i> | 161                  | 65 (40.4%)                         | 47 (29.2%)                          |
|                                                |                                                                                              | <i>Sb-Lgs1-CR3</i> |                      | 93 (57.8%)                         |                                     |
